# Supplementary material for: Source Apportionment and Influencing Factor Analysis of Residential Indoor PM2.5 in Beijing
Source: MDPI journal article supplement (doi:10.3390/ijerph15040686), 2018-04-05
Supplement: s1 [file s1]

## Supplementary Materials:

**Table S1.** Main summary of the baseline questionnaire and sampling questionnaire.

| Variables                             | Questions                                                                           | Response(s)                                                                                     |
|---------------------------------------|-------------------------------------------------------------------------------------|-------------------------------------------------------------------------------------------------|
| Baseline questionnaire                |                                                                                     |                                                                                                 |
| <i>household characteristics</i>      |                                                                                     |                                                                                                 |
| building type                         | What type of building is your house?                                                | apartment, villa, courtyard                                                                     |
| building age                          | How old is your house?                                                              | specific years                                                                                  |
| building height                       | What floor is your house on?                                                        | specific floors                                                                                 |
| room number                           | How many rooms are in your house?                                                   | specific room number                                                                            |
| total household income(Yuan)          | Normally, what annual income range does your family belong to?                      | <50000,50000-100000,100000-150000,>150000                                                       |
| population                            | Normally, how many people live in your house?                                       | specific population number                                                                      |
| <i>Indoor source</i>                  |                                                                                     |                                                                                                 |
| number of smokers                     | Normally, how many smokers live in your house?                                      | specific smoker number                                                                          |
| average frequency of cooking each day | Normally, what is the average frequency of cooking each day in your house?          | 0,1,2,3,other                                                                                   |
| average time to cook a meal(min)      | Normally, what is the average time to cook a meal in your house?                    | <20,20-40,40-60,>60mi                                                                           |
| cooking fuel type                     | Normally, what type of cooking fuel do you use in your house?                       | liquefied petroleum gas, coal gas, nature gas, electric                                         |
| hoods                                 | Normally, do you use a hood during cooking in your house?                           | Yes or No                                                                                       |
| <i>Heating and ventilation</i>        |                                                                                     |                                                                                                 |
| air conditioner(AC) use               | Normally, do you use an AC in your house?                                           | Yes or No                                                                                       |
| heating type                          | What type of heating does your house use?                                           | centralized heating, AC, electric heating, other                                                |
| window type                           | What type of windows does your house have?                                          | uphill extrapolation, forward and backward extrapolation, up and down pull, left and right pull |
| number of open windows                | Normally, how many windows do you open every day in the non-heating/heating period? | all, some, none                                                                                 |
| open window width                     | Normally, what is the percentage of windows you open in the                         | <10%,10-20%,20-50%,50-80%,100%                                                                  |

|                                          |                                                                                                  |                                                                                                       |
|------------------------------------------|--------------------------------------------------------------------------------------------------|-------------------------------------------------------------------------------------------------------|
|                                          | non-heating/heating period?                                                                      |                                                                                                       |
| open window time                         | Normally, for how many hours do you open windows each day during the non-heating/heating period? | specific hours                                                                                        |
| air cleaner use                          | Normally, do you use air cleaner in your house?                                                  | Yes or No                                                                                             |
| Sampling questionnaire                   |                                                                                                  |                                                                                                       |
| <i>Indoor source</i>                     |                                                                                                  |                                                                                                       |
| smoking during sampling                  | Was there anyone (include guests) smoking in your house during sampling?                         | Yes or No                                                                                             |
| number of smokers per day                | How many smokers smoked in your house per day during sampling?                                   | specific smoker number                                                                                |
| number of cigarettes per day             | What was the number of cigarettes smoked per day in your house during sampling?                  | specific number of cigarettes                                                                         |
| average frequency of cooking per day     | What was the average frequency of cooking per day in your house during sampling?                 | 0,1,2,3,other                                                                                         |
| average time to cook a meal per day(min) | What was the average time to cook a meal per day in your house during sampling?                  | <20,20-40,40-60,>60                                                                                   |
| hoods used during sampling               | What was the frequency of hood use in your house during sampling?                                | All the cooking time, half the cooking time, hardly use hood                                          |
| <i>Heating and ventilation</i>           |                                                                                                  |                                                                                                       |
| AC use during sampling                   | Did you use an AC in your house during sampling?                                                 | Yes or No                                                                                             |
| temperature of AC                        | What was the temperature setting for the AC?                                                     | specific temperature                                                                                  |
| frequency of AC use                      | What was the frequency of AC use in your house during sampling?                                  | Almost daily ,more than half the days of sampling, less than half the days of sampling, hardly use AC |
| heating use                              | Did you use heating in your house during sampling?                                               | Yes or No                                                                                             |
| number of windows open per day           | How many windows did you open per day during sampling?                                           | all, some, none                                                                                       |
| width of window open per day             | What was the percentage of windows open per day during sampling?                                 | <10%,10-20%,20-50%,50-80%,100%                                                                        |
| time of window open per day              | What was the average window open time per day in your house                                      | specific hours                                                                                        |

|                      |                                                            |           |
|----------------------|------------------------------------------------------------|-----------|
| during sampling?     |                                                            |           |
| fresh air system use | Do you use fresh air system in your house during sampling? | Yes or No |
| air cleaner use      | Do you use air cleaner in your house during sampling?      | Yes or No |

**Table S2.** Summary of operation conditions of the ICP-MS in this study.

| <b>Instrument parameter</b> | <b>Setting</b> |
|-----------------------------|----------------|
| Spray chamber               | Cyclonic       |
| Nebulizer gas flow          | 0.92 L/min     |
| Cones                       | Pt             |
| Auxiliary gas flow          | 1.20 L/min     |
| Plasma gas flow             | 18 L/min       |
| ICP RF power                | 1400 W         |
| Scan mode                   | Peak hoping    |
| Detector mode               | Dual           |
| Analog stage voltage        | −1725          |
| Pulse stage voltage         | 800            |
| Discriminator threshold     | 11             |
| Quadrupole rod offset       | 0              |
| Scan mode                   | Peak hoping    |
| Detector mode               | Dual           |
| Process spectral peak       | Average        |
| Process signal profile      | Average        |
| Dwell time                  | 100 ms         |
| Sweeps/reading              | 20             |
| Replicates                  | 3              |
| Sweeps/reading              | 20             |
| Replicates                  | 3              |

**Table S3.** Summary of detection limits for chemical elements in this study.

| <b>Elements</b> | <b>Detection Limits</b> |
|-----------------|-------------------------|
| Al(ug/L)        | 4.0                     |
| V(ng/L)         | 58.7                    |
| Mn(ug/L)        | 0.2                     |
| Fe(ug/L)        | 31.7                    |
| Cu(ug/L)        | 0.4                     |
| Zn(ug/L)        | 2.3                     |
| As(ng/L)        | 53.4                    |
| Se(ug/L)        | 0.6                     |
| Cd(ng/L)        | 5.0                     |
| Tl(ng/L)        | 0.8                     |
| Pb(ng/L)        | 59.5                    |
| Na(ug/L)        | 6.4                     |
| Mg(ug/L)        | 4.8                     |
| K(ug/L)         | 9.6                     |
| Ca(ug/L)        | 19.0                    |
